# Supplementary material for: Complications and mortality of non-typhoidal salmonella invasive disease: a global systematic review and meta-analysis
Source: PubMed Central journal article supplement (PMC9021030; doi:10.1016/s1473-3099(21)00615-0), 2022-05

# THE LANCET

## Infectious Diseases

### Supplementary appendix

This appendix formed part of the original submission and has been peer reviewed. We post it as supplied by the authors.

Supplement to: Marchello CS, Birkhold M, Crump JA, on behalf of the Vacc-iNTS consortium collaborators. Complications and mortality of non-typhoidal salmonella invasive disease: a global systematic review and meta-analysis. *Lancet Infect Dis* 2022; published online Jan 31. [https://doi.org/10.1016/S1473-3099\(21\)00615-0](https://doi.org/10.1016/S1473-3099(21)00615-0).

## **Supplementary Appendix**

**Supplement to: Complications and mortality of non-typhoidal *Salmonella* invasive disease: a global systematic review and meta-analysis**

## Supplementary Appendix A – initial search strategy 21 May 2020

### PubMed 21 May 2020

(((((nontyph\* OR non-typh\* OR "iNTS" OR "salmonella group" OR "salmonellosis" OR typhimurium OR enteritidis OR (salmonella AND Heidelberg) OR (salmonella AND Dublin) OR (salmonella AND Choleraesuis) OR (salmonella AND Newport) OR (salmonella AND Virchow) OR (salmonella AND Concord) OR (salmonella AND Brancaster) OR (salmonella AND freetown) OR (salmonella AND "Infantis") OR (salmonella AND Isangi)))))) AND ((mortality OR "morbidity"[All Fields] OR "morbidity"[MeSH Terms] OR died or fatal\* or complicat\* or meningitis or arthritis or abscess or pneumon\* or shock or relapse or recurr\* or splen\*)) NOT (("Animals, Wild"[MeSH Terms] OR cell OR mouse OR rat OR rodent\* OR bat OR bats OR cattle)) AND (hasabstract[text] AND Humans[Mesh])

#### Search Details

| Query Translation:                                                                                                                                                                                                                                                                                                                                                                                                                                                                                                                                                                                                                                                                                                                                               |                                                                               |
|------------------------------------------------------------------------------------------------------------------------------------------------------------------------------------------------------------------------------------------------------------------------------------------------------------------------------------------------------------------------------------------------------------------------------------------------------------------------------------------------------------------------------------------------------------------------------------------------------------------------------------------------------------------------------------------------------------------------------------------------------------------|-------------------------------------------------------------------------------|
| (((nontyphi[All Fields] OR nontyphodial[All Fields] OR nontyphoid[All Fields] OR nontyphoidal[All Fields] OR nontyphoidalserovars[All Fields] OR nontyphoideal[All Fields] OR nontyphoidic[All Fields] OR nontyphosa[All                                                                                                                                                                                                                                                                                                                                                                                                                                                                                                                                         |                                                                               |
| Search                                                                                                                                                                                                                                                                                                                                                                                                                                                                                                                                                                                                                                                                                                                                                           | URL                                                                           |
| Result:                                                                                                                                                                                                                                                                                                                                                                                                                                                                                                                                                                                                                                                                                                                                                          |                                                                               |
| 2453                                                                                                                                                                                                                                                                                                                                                                                                                                                                                                                                                                                                                                                                                                                                                             |                                                                               |
| Translations:                                                                                                                                                                                                                                                                                                                                                                                                                                                                                                                                                                                                                                                                                                                                                    |                                                                               |
| salmonella                                                                                                                                                                                                                                                                                                                                                                                                                                                                                                                                                                                                                                                                                                                                                       | "salmonella"[MeSH Terms] OR "salmonella"[All Fields]                          |
| Newport                                                                                                                                                                                                                                                                                                                                                                                                                                                                                                                                                                                                                                                                                                                                                          | "Newport"[Journal] OR "newport"[All Fields]                                   |
| Concord                                                                                                                                                                                                                                                                                                                                                                                                                                                                                                                                                                                                                                                                                                                                                          | "Afr Concord"[Journal] OR "concord"[All Fields]                               |
| mortality                                                                                                                                                                                                                                                                                                                                                                                                                                                                                                                                                                                                                                                                                                                                                        | "mortality"[Subheading] OR "mortality"[All Fields] OR "mortality"[MeSH Terms] |
| died                                                                                                                                                                                                                                                                                                                                                                                                                                                                                                                                                                                                                                                                                                                                                             | "death"[MeSH Terms] OR "death"[All Fields] OR "died"[All Fields]              |
| meningitis                                                                                                                                                                                                                                                                                                                                                                                                                                                                                                                                                                                                                                                                                                                                                       | "meningitis"[MeSH Terms] OR "meningitis"[All Fields]                          |
| arthritis                                                                                                                                                                                                                                                                                                                                                                                                                                                                                                                                                                                                                                                                                                                                                        | "arthritis"[MeSH Terms] OR "arthritis"[All Fields]                            |
| abscess                                                                                                                                                                                                                                                                                                                                                                                                                                                                                                                                                                                                                                                                                                                                                          | "abscess"[MeSH Terms] OR "abscess"[All Fields]                                |
| shock                                                                                                                                                                                                                                                                                                                                                                                                                                                                                                                                                                                                                                                                                                                                                            | "shock"[MeSH Terms] OR "shock"[All Fields]                                    |
| relapse                                                                                                                                                                                                                                                                                                                                                                                                                                                                                                                                                                                                                                                                                                                                                          | "recurrence"[MeSH Terms] OR "recurrence"[All Fields] OR "relapse"[All Fields] |
| cell                                                                                                                                                                                                                                                                                                                                                                                                                                                                                                                                                                                                                                                                                                                                                             | "cells"[MeSH Terms] OR "cells"[All Fields] OR "cell"[All Fields]              |
| mouse                                                                                                                                                                                                                                                                                                                                                                                                                                                                                                                                                                                                                                                                                                                                                            | "mice"[MeSH Terms] OR "mice"[All Fields] OR "mouse"[All Fields]               |
| rat                                                                                                                                                                                                                                                                                                                                                                                                                                                                                                                                                                                                                                                                                                                                                              | "rats"[MeSH Terms] OR "rats"[All Fields] OR "rat"[All Fields]                 |
| bat                                                                                                                                                                                                                                                                                                                                                                                                                                                                                                                                                                                                                                                                                                                                                              | "Behav Anal Today"[Journal] OR "bat"[All Fields]                              |
| bats                                                                                                                                                                                                                                                                                                                                                                                                                                                                                                                                                                                                                                                                                                                                                             | "chiroptera"[MeSH Terms] OR "chiroptera"[All Fields] OR "bats"[All Fields]    |
| cattle                                                                                                                                                                                                                                                                                                                                                                                                                                                                                                                                                                                                                                                                                                                                                           | "cattle"[MeSH Terms] OR "cattle"[All Fields]                                  |
| Humans[Mesh]                                                                                                                                                                                                                                                                                                                                                                                                                                                                                                                                                                                                                                                                                                                                                     | "humans"[MeSH Terms]                                                          |
| Database:                                                                                                                                                                                                                                                                                                                                                                                                                                                                                                                                                                                                                                                                                                                                                        |                                                                               |
| PubMed                                                                                                                                                                                                                                                                                                                                                                                                                                                                                                                                                                                                                                                                                                                                                           |                                                                               |
| User query:                                                                                                                                                                                                                                                                                                                                                                                                                                                                                                                                                                                                                                                                                                                                                      |                                                                               |
| ((((nontyph* OR non-typh* OR "iNTS" OR "salmonella group" OR "salmonellosis" OR typhimurium OR enteritidis OR (salmonella AND Heidelberg) OR (salmonella AND Dublin) OR (salmonella AND Choleraesuis) OR (salmonella AND Newport) OR (salmonella AND Virchow) OR (salmonella AND Concord) OR (salmonella AND Brancaster) OR (salmonella AND freetown) OR (salmonella AND "Infantis") OR (salmonella AND Isangi)))))) AND ((mortality OR "morbidity"[All Fields] OR "morbidity"[MeSH Terms] OR died or fatal* or complicat* or meningitis or arthritis or abscess or pneumon* or shock or relapse or recurr* or splen*)) NOT (("Animals, Wild"[MeSH Terms] OR cell OR mouse OR rat OR rodent* OR bat OR bats OR cattle)) AND (hasabstract[text] AND Humans[Mesh]) |                                                                               |

## Web of Science 21 May 2020

(TS=(mortality OR morbidity OR death OR died or fatal\* or complicat\* or meningitis or arthritis or abscess or pneumon\* or shock or relapse or recurr\* or splen\*)) AND (TS=(nontyph\* OR non-typh\* OR "iNTS" OR "salmonella group" OR "salmonellosis" OR typhimurium OR enteritidis) OR TS=(salmonella AND Heidelberg) OR TS=(salmonella AND Dublin) OR TS=(salmonella AND Choleraesuis) OR TS=(salmonella AND Newport) OR TS=(salmonella AND Virchow) OR TS=(salmonella AND Concord) OR TS=(salmonella AND Brancaster) OR TS=(salmonella AND "freetown") OR TS=(salmonella AND "Infantis") OR TS=(salmonella AND Isangi)) NOT (TS=(extract\* OR carcass\* OR cell OR mouse OR rat OR rodent\* OR bat OR bats OR cattle))

Refined by: [excluding] RESEARCH AREAS: ( GENETICS HEREDITY OR VETERINARY SCIENCES OR ZOOLOGY OR ENDOCRINOLOGY METABOLISM OR MATHEMATICS OR PLANT SCIENCES OR BUSINESS ECONOMICS OR DERMATOLOGY OR BIOPHYSICS OR MATHEMATICAL COMPUTATIONAL BIOLOGY OR ENGINEERING OR COMPUTER SCIENCE OR MARINE FRESHWATER BIOLOGY OR MATERIALS SCIENCE OR BIODIVERSITY CONSERVATION OR PHYSICS OR METEOROLOGY ATMOSPHERIC SCIENCES OR ANTHROPOLOGY OR GOVERNMENT LAW OR LEGAL MEDICINE OR EDUCATION EDUCATIONAL RESEARCH OR SUBSTANCE ABUSE OR PSYCHIATRY OR POLYMER SCIENCE OR HISTORY OR ELECTROCHEMISTRY OR FORESTRY OR SPORT SCIENCES OR FISHERIES OR GEOGRAPHY OR PUBLIC ADMINISTRATION OR ENERGY FUELS OR INTERNATIONAL RELATIONS ) AND [excluding] DOCUMENT TYPES: ( ABSTRACT OR LETTER OR MEETING OR EDITORIAL OR BOOK OR PATENT OR NEWS OR REPORT )

Databases= WOS, BCI, CCC, INSPEC, MEDLINE, SCIELO Timespan=All years

Search language=Auto

| Set | Results                                                                                                                                                                                                                                                                                                                                                                                                                                                                                                                                                                                                                                                                                                                                                                                                                                                                                                                                                                                                                                                                                                                                                                                                                                                                                                                                                                                                                                                                                                                                                                                                                                                                                | Save History / Create Alert | Open Saved History | Combine Sets                                                                                 | Delete Sets                                                                        |
|-----|----------------------------------------------------------------------------------------------------------------------------------------------------------------------------------------------------------------------------------------------------------------------------------------------------------------------------------------------------------------------------------------------------------------------------------------------------------------------------------------------------------------------------------------------------------------------------------------------------------------------------------------------------------------------------------------------------------------------------------------------------------------------------------------------------------------------------------------------------------------------------------------------------------------------------------------------------------------------------------------------------------------------------------------------------------------------------------------------------------------------------------------------------------------------------------------------------------------------------------------------------------------------------------------------------------------------------------------------------------------------------------------------------------------------------------------------------------------------------------------------------------------------------------------------------------------------------------------------------------------------------------------------------------------------------------------|-----------------------------|--------------------|----------------------------------------------------------------------------------------------|------------------------------------------------------------------------------------|
| # 3 | 2,712                                                                                                                                                                                                                                                                                                                                                                                                                                                                                                                                                                                                                                                                                                                                                                                                                                                                                                                                                                                                                                                                                                                                                                                                                                                                                                                                                                                                                                                                                                                                                                                                                                                                                  |                             |                    | <input type="radio"/> AND <input type="radio"/> OR<br><input type="button" value="Combine"/> | <input type="button" value="Select All"/><br><input type="button" value="Delete"/> |
|     | <p>(TS=(mortality OR morbidity OR death OR died or fatal* or complicat* or meningitis or arthritis or abscess or pneumon* or shock or relapse or recurr* or splen*)) AND (TS=(nontyph* OR non-typh* OR "iNTS" OR "salmonella group" OR "salmonellosis" OR typhimurium OR enteritidis) OR TS=(salmonella AND Heidelberg) OR TS=(salmonella AND Dublin) OR TS=(salmonella AND Choleraesuis) OR TS=(salmonella AND Newport) OR TS=(salmonella AND Virchow) OR TS=(salmonella AND Concord) OR TS=(salmonella AND Brancaster) OR TS=(salmonella AND "freetown") OR TS=(salmonella AND "Infantis") OR TS=(salmonella AND Isangi)) NOT (TS=(extract* OR carcass* OR cell OR mouse OR rat OR rodent* OR bat OR bats OR cattle))</p> <p>Refined by: [excluding] RESEARCH AREAS: ( GENETICS HEREDITY OR VETERINARY SCIENCES OR ZOOLOGY OR ENDOCRINOLOGY METABOLISM OR MATHEMATICS OR PLANT SCIENCES OR BUSINESS ECONOMICS OR DERMATOLOGY OR BIOPHYSICS OR MATHEMATICAL COMPUTATIONAL BIOLOGY OR ENGINEERING OR COMPUTER SCIENCE OR MARINE FRESHWATER BIOLOGY OR MATERIALS SCIENCE OR BIODIVERSITY CONSERVATION OR PHYSICS OR METEOROLOGY ATMOSPHERIC SCIENCES OR ANTHROPOLOGY OR GOVERNMENT LAW OR LEGAL MEDICINE OR EDUCATION EDUCATIONAL RESEARCH OR SUBSTANCE ABUSE OR PSYCHIATRY OR POLYMER SCIENCE OR HISTORY OR ELECTROCHEMISTRY OR FORESTRY OR SPORT SCIENCES OR FISHERIES OR GEOGRAPHY OR PUBLIC ADMINISTRATION OR ENERGY FUELS OR INTERNATIONAL RELATIONS ) AND [excluding] DOCUMENT TYPES: ( ABSTRACT OR LETTER OR MEETING OR EDITORIAL OR BOOK OR PATENT OR NEWS OR REPORT )</p> <p>Databases= WOS, BCI, CCC, INSPEC, MEDLINE, SCIELO Timespan=All years<br/>Search language=Auto</p> |                             |                    |                                                                                              |                                                                                    |
| # 2 | 3,691                                                                                                                                                                                                                                                                                                                                                                                                                                                                                                                                                                                                                                                                                                                                                                                                                                                                                                                                                                                                                                                                                                                                                                                                                                                                                                                                                                                                                                                                                                                                                                                                                                                                                  |                             |                    | <input type="radio"/> AND <input type="radio"/> OR<br><input type="button" value="Combine"/> | <input type="button" value="Select All"/><br><input type="button" value="Delete"/> |
|     | <p>(TS=(mortality OR morbidity OR death OR died or fatal* or complicat* or meningitis or arthritis or abscess or pneumon* or shock or relapse or recurr* or splen*)) AND (TS=(nontyph* OR non-typh* OR "iNTS" OR "salmonella group" OR "salmonellosis" OR typhimurium OR enteritidis) OR TS=(salmonella AND Heidelberg) OR TS=(salmonella AND Dublin) OR TS=(salmonella AND Choleraesuis) OR TS=(salmonella AND Newport) OR TS=(salmonella AND Virchow) OR TS=(salmonella AND Concord) OR TS=(salmonella AND Brancaster) OR TS=(salmonella AND "freetown") OR TS=(salmonella AND "Infantis") OR TS=(salmonella AND Isangi)) NOT (TS=(extract* OR carcass* OR cell OR mouse OR rat OR rodent* OR bat OR bats OR cattle))</p> <p>Refined by: [excluding] RESEARCH AREAS: ( GENETICS HEREDITY OR VETERINARY SCIENCES OR ZOOLOGY OR ENDOCRINOLOGY METABOLISM OR MATHEMATICS OR PLANT SCIENCES OR BUSINESS ECONOMICS OR DERMATOLOGY OR BIOPHYSICS OR MATHEMATICAL COMPUTATIONAL BIOLOGY OR ENGINEERING OR COMPUTER SCIENCE OR MARINE FRESHWATER BIOLOGY OR MATERIALS SCIENCE OR BIODIVERSITY CONSERVATION OR PHYSICS OR METEOROLOGY ATMOSPHERIC SCIENCES OR ANTHROPOLOGY OR GOVERNMENT LAW OR LEGAL MEDICINE OR EDUCATION EDUCATIONAL RESEARCH OR SUBSTANCE ABUSE OR PSYCHIATRY OR POLYMER SCIENCE OR HISTORY OR ELECTROCHEMISTRY OR FORESTRY OR SPORT SCIENCES OR FISHERIES OR GEOGRAPHY OR PUBLIC ADMINISTRATION OR ENERGY FUELS OR INTERNATIONAL RELATIONS )</p> <p>Databases= WOS, BCI, CCC, INSPEC, MEDLINE, SCIELO Timespan=All years<br/>Search language=Auto</p>                                                                                                                    |                             |                    |                                                                                              |                                                                                    |
| # 1 | 7,880                                                                                                                                                                                                                                                                                                                                                                                                                                                                                                                                                                                                                                                                                                                                                                                                                                                                                                                                                                                                                                                                                                                                                                                                                                                                                                                                                                                                                                                                                                                                                                                                                                                                                  |                             |                    | <input type="radio"/> AND <input type="radio"/> OR<br><input type="button" value="Combine"/> | <input type="button" value="Select All"/><br><input type="button" value="Delete"/> |
|     | <p>(TS=(mortality OR morbidity OR death OR died or fatal* or complicat* or meningitis or arthritis or abscess or pneumon* or shock or relapse or recurr* or splen*)) AND (TS=(nontyph* OR non-typh* OR "iNTS" OR "salmonella group" OR "salmonellosis" OR typhimurium OR enteritidis) OR TS=(salmonella AND Heidelberg) OR TS=(salmonella AND Dublin) OR TS=(salmonella AND Choleraesuis) OR TS=(salmonella AND Newport) OR TS=(salmonella AND Virchow) OR TS=(salmonella AND Concord) OR TS=(salmonella AND Brancaster) OR TS=(salmonella AND "freetown") OR TS=(salmonella AND "Infantis") OR TS=(salmonella AND Isangi)) NOT (TS=(extract* OR carcass* OR cell OR mouse OR rat OR rodent* OR bat OR bats OR cattle))</p> <p>Databases= WOS, BCI, CCC, INSPEC, MEDLINE, SCIELO Timespan=All years<br/>Search language=Auto</p>                                                                                                                                                                                                                                                                                                                                                                                                                                                                                                                                                                                                                                                                                                                                                                                                                                                       |                             |                    |                                                                                              |                                                                                    |

# Embase Classic+Embase (1947 to 2020 May 21) + Ovid MEDLINE and Epub Ahead of Print, In-Process & Other Non-Indexed Citations, Daily and Versions (1946 to May 21, 2020)

▼ Search History (42) View Saved

| # ▲                      | Searches                                                                                                                                                                                                                                                                                                                                                                                                          | Results  | Type     | Actions                                                | Annotations              |
|--------------------------|-------------------------------------------------------------------------------------------------------------------------------------------------------------------------------------------------------------------------------------------------------------------------------------------------------------------------------------------------------------------------------------------------------------------|----------|----------|--------------------------------------------------------|--------------------------|
| <input type="checkbox"/> | 1 ▶ (salmonella and typhimurium).af.                                                                                                                                                                                                                                                                                                                                                                              | 81313    | Advanced | <a href="#">Display Results</a> <a href="#">More ▼</a> | <input type="checkbox"/> |
| <input type="checkbox"/> | 2 ▶ (salmonella and enteritidis).af.                                                                                                                                                                                                                                                                                                                                                                              | 17788    | Advanced | <a href="#">Display Results</a> <a href="#">More ▼</a> | <input type="checkbox"/> |
| <input type="checkbox"/> | 3 ▶ (salmonella and Heidelberg).af.                                                                                                                                                                                                                                                                                                                                                                               | 2561     | Advanced | <a href="#">Display Results</a> <a href="#">More ▼</a> | <input type="checkbox"/> |
| <input type="checkbox"/> | 4 ▶ (salmonella and Dublin).af.                                                                                                                                                                                                                                                                                                                                                                                   | 2983     | Advanced | <a href="#">Display Results</a> <a href="#">More ▼</a> | <input type="checkbox"/> |
| <input type="checkbox"/> | 5 ▶ (salmonella and Choleraesuis).af.                                                                                                                                                                                                                                                                                                                                                                             | 1890     | Advanced | <a href="#">Display Results</a> <a href="#">More ▼</a> | <input type="checkbox"/> |
| <input type="checkbox"/> | 6 ▶ (salmonella and newport).af.                                                                                                                                                                                                                                                                                                                                                                                  | 1585     | Advanced | <a href="#">Display Results</a> <a href="#">More ▼</a> | <input type="checkbox"/> |
| <input type="checkbox"/> | 7 ▶ (salmonella and virchow).af.                                                                                                                                                                                                                                                                                                                                                                                  | 882      | Advanced | <a href="#">Display Results</a> <a href="#">More ▼</a> | <input type="checkbox"/> |
| <input type="checkbox"/> | 8 ▶ (salmonella and concord).af.                                                                                                                                                                                                                                                                                                                                                                                  | 77       | Advanced | <a href="#">Display Results</a> <a href="#">More ▼</a> | <input type="checkbox"/> |
| <input type="checkbox"/> | 9 ▶ (salmonella and Brancaster).af.                                                                                                                                                                                                                                                                                                                                                                               | 35       | Advanced | <a href="#">Display Results</a> <a href="#">More ▼</a> | <input type="checkbox"/> |
| <input type="checkbox"/> | 10 ▶ (salmonella and freetown).af.                                                                                                                                                                                                                                                                                                                                                                                | 15       | Advanced | <a href="#">Display Results</a> <a href="#">More ▼</a> | <input type="checkbox"/> |
| <input type="checkbox"/> | 11 ▶ (salmonella and infantis).af.                                                                                                                                                                                                                                                                                                                                                                                | 1768     | Advanced | <a href="#">Display Results</a> <a href="#">More ▼</a> | <input type="checkbox"/> |
| <input type="checkbox"/> | 12 ▶ (salmonella and Isangi).af.                                                                                                                                                                                                                                                                                                                                                                                  | 73       | Advanced | <a href="#">Display Results</a> <a href="#">More ▼</a> | <input type="checkbox"/> |
| <input type="checkbox"/> | 13 ▶ remove duplicates from 3                                                                                                                                                                                                                                                                                                                                                                                     | 1961     | Advanced | <a href="#">Display Results</a> <a href="#">More ▼</a> | <input type="checkbox"/> |
| <input type="checkbox"/> | 14 ▶ remove duplicates from 4                                                                                                                                                                                                                                                                                                                                                                                     | 1843     | Advanced | <a href="#">Display Results</a> <a href="#">More ▼</a> | <input type="checkbox"/> |
| <input type="checkbox"/> | 15 ▶ remove duplicates from 5                                                                                                                                                                                                                                                                                                                                                                                     | 1185     | Advanced | <a href="#">Display Results</a> <a href="#">More ▼</a> | <input type="checkbox"/> |
| <input type="checkbox"/> | 16 ▶ remove duplicates from 6                                                                                                                                                                                                                                                                                                                                                                                     | 1006     | Advanced | <a href="#">Display Results</a> <a href="#">More ▼</a> | <input type="checkbox"/> |
| <input type="checkbox"/> | 17 ▶ remove duplicates from 7                                                                                                                                                                                                                                                                                                                                                                                     | 547      | Advanced | <a href="#">Display Results</a> <a href="#">More ▼</a> | <input type="checkbox"/> |
| <input type="checkbox"/> | 18 ▶ remove duplicates from 8                                                                                                                                                                                                                                                                                                                                                                                     | 51       | Advanced | <a href="#">Display Results</a> <a href="#">More ▼</a> | <input type="checkbox"/> |
| <input type="checkbox"/> | 19 ▶ remove duplicates from 9                                                                                                                                                                                                                                                                                                                                                                                     | 21       | Advanced | <a href="#">Display Results</a> <a href="#">More ▼</a> | <input type="checkbox"/> |
| <input type="checkbox"/> | 20 ▶ remove duplicates from 10                                                                                                                                                                                                                                                                                                                                                                                    | 11       | Advanced | <a href="#">Display Results</a> <a href="#">More ▼</a> | <input type="checkbox"/> |
| <input type="checkbox"/> | 21 ▶ remove duplicates from 11                                                                                                                                                                                                                                                                                                                                                                                    | 1132     | Advanced | <a href="#">Display Results</a> <a href="#">More ▼</a> | <input type="checkbox"/> |
| <input type="checkbox"/> | 22 ▶ remove duplicates from 12                                                                                                                                                                                                                                                                                                                                                                                    | 43       | Advanced | <a href="#">Display Results</a> <a href="#">More ▼</a> | <input type="checkbox"/> |
| <input type="checkbox"/> | 23 ▶ 1 or 2 or 13 or 14 or 15 or 16 or 17 or 18 or 19 or 20 or 21 or 22                                                                                                                                                                                                                                                                                                                                           | 97931    | Advanced | <a href="#">Display Results</a> <a href="#">More ▼</a> | <input type="checkbox"/> |
| <input type="checkbox"/> | 24 ▶ nontyph*.af.                                                                                                                                                                                                                                                                                                                                                                                                 | 1840     | Advanced | <a href="#">Display Results</a> <a href="#">More ▼</a> | <input type="checkbox"/> |
| <input type="checkbox"/> | 25 ▶ non-typh*.af.                                                                                                                                                                                                                                                                                                                                                                                                | 2878     | Advanced | <a href="#">Display Results</a> <a href="#">More ▼</a> | <input type="checkbox"/> |
| <input type="checkbox"/> | 26 ▶ salmonellosis.af.                                                                                                                                                                                                                                                                                                                                                                                            | 30646    | Advanced | <a href="#">Display Results</a> <a href="#">More ▼</a> | <input type="checkbox"/> |
| <input type="checkbox"/> | 27 ▶ "INTS".af.                                                                                                                                                                                                                                                                                                                                                                                                   | 2187     | Advanced | <a href="#">Display Results</a> <a href="#">More ▼</a> | <input type="checkbox"/> |
| <input type="checkbox"/> | 28 ▶ (salmonella adj7 group).af.                                                                                                                                                                                                                                                                                                                                                                                  | 2753     | Advanced | <a href="#">Display Results</a> <a href="#">More ▼</a> | <input type="checkbox"/> |
| <input type="checkbox"/> | 29 ▶ remove duplicates from 24                                                                                                                                                                                                                                                                                                                                                                                    | 1106     | Advanced | <a href="#">Display Results</a> <a href="#">More ▼</a> | <input type="checkbox"/> |
| <input type="checkbox"/> | 30 ▶ remove duplicates from 25                                                                                                                                                                                                                                                                                                                                                                                    | 1781     | Advanced | <a href="#">Display Results</a> <a href="#">More ▼</a> | <input type="checkbox"/> |
| <input type="checkbox"/> | 31 ▶ remove duplicates from 27                                                                                                                                                                                                                                                                                                                                                                                    | 1599     | Advanced | <a href="#">Display Results</a> <a href="#">More ▼</a> | <input type="checkbox"/> |
| <input type="checkbox"/> | 32 ▶ remove duplicates from 28                                                                                                                                                                                                                                                                                                                                                                                    | 1826     | Advanced | <a href="#">Display Results</a> <a href="#">More ▼</a> | <input type="checkbox"/> |
| <input type="checkbox"/> | 33 ▶ 23 or 26 or 29 or 30 or 31 or 32                                                                                                                                                                                                                                                                                                                                                                             | 119820   | Advanced | <a href="#">Display Results</a> <a href="#">More ▼</a> | <input type="checkbox"/> |
| <input type="checkbox"/> | 34 ▶ limit 33 to human                                                                                                                                                                                                                                                                                                                                                                                            | 36388    | Advanced | <a href="#">Display Results</a> <a href="#">More ▼</a> | <input type="checkbox"/> |
| <input type="checkbox"/> | 35 ▶ limit 34 to journal [Limit not valid in Ovid MEDLINE(R),Ovid MEDLINE(R) Daily Update,Ovid MEDLINE(R) In-Process,Ovid MEDLINE(R) Publisher, records were retained]                                                                                                                                                                                                                                            | 36250    | Advanced | <a href="#">Display Results</a> <a href="#">More ▼</a> | <input type="checkbox"/> |
| <input type="checkbox"/> | 36 ▶ (mortality or morbidity or death or died or fatal* or complicat* or meningitis or arthritis or abscess or pneumon* or shock or relapse or recur* or splen*) .af                                                                                                                                                                                                                                              | 13331317 | Advanced | <a href="#">Display Results</a> <a href="#">More ▼</a> | <input type="checkbox"/> |
| <input type="checkbox"/> | 37 ▶ limit 36 to human                                                                                                                                                                                                                                                                                                                                                                                            | 10720398 | Advanced | <a href="#">Display Results</a> <a href="#">More ▼</a> | <input type="checkbox"/> |
| <input type="checkbox"/> | 38 ▶ limit 37 to journal [Limit not valid in Ovid MEDLINE(R),Ovid MEDLINE(R) Daily Update,Ovid MEDLINE(R) In-Process,Ovid MEDLINE(R) Publisher, records were retained]                                                                                                                                                                                                                                            | 10702725 | Advanced | <a href="#">Display Results</a> <a href="#">More ▼</a> | <input type="checkbox"/> |
| <input type="checkbox"/> | 39 ▶ (35 and 38) not (extract* or carcass* or cell or mouse or rat or rodent* or bat or bats or cattle or papillomavirus or "HPV" or aquatic or marine or wild* or "pet" or "pets").af.                                                                                                                                                                                                                           | 7116     | Advanced | <a href="#">Display Results</a> <a href="#">More ▼</a> | <input type="checkbox"/> |
| <input type="checkbox"/> | 40 ▶ limit 39 to (article or clinical study or clinical trial, all or clinical trial, phase i or clinical trial, phase ii or clinical trial, phase iii or clinical trial, phase iv or journal article or observational study or randomized controlled trial) [Limit not valid in Embase,Ovid MEDLINE(R),Ovid MEDLINE(R) Daily Update,Ovid MEDLINE(R) In-Process,Ovid MEDLINE(R) Publisher, records were retained] | 5532     | Advanced | <a href="#">Display Results</a> <a href="#">More ▼</a> | <input type="checkbox"/> |
| <input type="checkbox"/> | 41 ▶ limit 40 to abstracts                                                                                                                                                                                                                                                                                                                                                                                        | 4104     | Advanced | <a href="#">Display Results</a> <a href="#">More ▼</a> | <input type="checkbox"/> |
| <input type="checkbox"/> | 42 ▶ remove duplicates from 41                                                                                                                                                                                                                                                                                                                                                                                    | 3236     | Advanced | <a href="#">Display Results</a> <a href="#">More ▼</a> | <input type="checkbox"/> |

Combine with:  AND  OR  Deduplicate

## Supplementary Appendix B – updated search strategy 4 June 2021

### PubMed 4 June 2021

Search: ((((((nontyph\* OR non-typh\* OR "iNTS" OR "salmonella group" OR "salmonellosis" OR typhimurium OR enteritidis OR (salmonella AND Heidelberg) OR (salmonella AND Dublin) OR (salmonella AND Choleraesuis) OR (salmonella AND Newport) OR (salmonella AND Virchow) OR (salmonella AND Concord) OR (salmonella AND Brancaster) OR (salmonella AND freetown) OR (salmonella AND "Infantis") OR (salmonella AND Isangi)))))) AND ((mortality OR "morbidity"[All Fields] OR "morbidity"[MeSH Terms] OR died OR fatal\* OR complicat\* OR meningitis OR arthritis OR abscess OR pneumon\* OR shock OR relapse OR recurr\* OR splen\*)) NOT (("Animals, Wild"[MeSH Terms] OR cell OR mouse OR rat OR rodent\* OR bat OR bats OR cattle)) AND (hasabstract[text] AND Humans[Mesh]) AND "2020/05/20 19:29":"2021/06/03 20:15"[Date - MeSH])

History and Search Details Download Delete

| Search | Actions | Details | Query                                                                                                                                                                                                                                                                                                                                                                                                                                                                                                                                                                                                                                                                                                                                                                                                                                                                  | Results | Time     |
|--------|---------|---------|------------------------------------------------------------------------------------------------------------------------------------------------------------------------------------------------------------------------------------------------------------------------------------------------------------------------------------------------------------------------------------------------------------------------------------------------------------------------------------------------------------------------------------------------------------------------------------------------------------------------------------------------------------------------------------------------------------------------------------------------------------------------------------------------------------------------------------------------------------------------|---------|----------|
| #1     | ...     | >       | Search: ((((((nontyph* OR non-typh* OR "iNTS" OR "salmonella group" OR "salmonellosis" OR typhimurium OR enteritidis OR (salmonella AND Heidelberg) OR (salmonella AND Dublin) OR (salmonella AND Choleraesuis) OR (salmonella AND Newport) OR (salmonella AND Virchow) OR (salmonella AND Concord) OR (salmonella AND Brancaster) OR (salmonella AND freetown) OR (salmonella AND "Infantis") OR (salmonella AND Isangi)))))) AND ((mortality OR "morbidity"[All Fields] OR "morbidity"[MeSH Terms] OR died OR fatal* OR complicat* OR meningitis OR arthritis OR abscess OR pneumon* OR shock OR relapse OR recurr* OR splen*)) NOT (("Animals, Wild"[MeSH Terms] OR cell OR mouse OR rat OR rodent* OR bat OR bats OR cattle)) AND (hasabstract[text] AND Humans[Mesh]) AND "2020/05/20 19:29":"2021/06/03 20:15"[Date - MeSH]) - Saved search Sort by: Most Recent | 78      | 20:45:44 |

Showing 1 to 1 of 1 entries

NCBI Literature Resources: [MeSH](#) [PMC](#) [BookShelf](#)



## Web of Science 4 June 2020

(TS=(mortality OR morbidity OR death OR died or fatal\* or complicat\* or meningitis or arthritis or abscess or pneumon\* or shock or relapse or recurr\* or splen\* ) AND (TS=(nontyph\* OR non-typh\* OR "iNTS" OR "salmonella group" OR "salmonellosis" OR typhimurium OR enteritidis) OR TS=(salmonella AND Heidelberg) OR TS=(salmonella AND Dublin) OR TS=(salmonella AND Choleraesuis) OR TS=(salmonella AND Newport) OR TS=(salmonella AND Virchow) OR TS=(salmonella AND Concord) OR TS=(salmonella AND Brancaster) OR TS=(salmonella AND "freetown") OR TS=(salmonella AND "Infantis") OR TS=(salmonella AND Isangi)) NOT (TS=(extract\* OR carcass\* OR cell OR mouse OR rat OR rodent\* OR bat OR bats OR cattle) )

**Refined by:** [excluding] **RESEARCH AREAS:** ( GENETICS HEREDITY OR VETERINARY SCIENCES OR ZOOLOGY OR ENDOCRINOLOGY METABOLISM OR MATHEMATICS OR PLANT SCIENCES OR BUSINESS ECONOMICS OR DERMATOLOGY OR BIOPHYSICS OR MATHEMATICAL COMPUTATIONAL BIOLOGY OR ENGINEERING OR COMPUTER SCIENCE OR MARINE FRESHWATER BIOLOGY OR MATERIALS SCIENCE OR BIODIVERSITY CONSERVATION OR PHYSICS OR METEOROLOGY ATMOSPHERIC SCIENCES OR ANTHROPOLOGY OR GOVERNMENT LAW OR LEGAL MEDICINE OR EDUCATION EDUCATIONAL RESEARCH OR SUBSTANCE ABUSE OR PSYCHIATRY OR POLYMER SCIENCE OR HISTORY OR ELECTROCHEMISTRY OR FORESTRY OR SPORT SCIENCES OR FISHERIES OR GEOGRAPHY OR PUBLIC ADMINISTRATION OR ENERGY FUELS OR INTERNATIONAL RELATIONS ) AND [excluding] **DOCUMENT TYPES:** ( ABSTRACT OR LETTER OR MEETING OR EDITORIAL OR BOOK OR PATENT OR NEWS OR REPORT )

Databases= WOS, BCI, CCC, INSPEC, KJD, MEDLINE, RSCI, SCIELO, ZOOREC Timespan=2020-2021

Search language=Auto

| Set | Results | Save History / Create Alert                                                                                                                                                                                                                                                                                                                                                                                                                                                                                                                                                                                                                                                                                                                                                                                                                                                                                                                                                                                                                                                                                                                                                                                                                                                                                                                                                                                                                                                                                                                                                                                                                                                                                                     | Open Saved History | Combine Sets                                                  | Delete Sets                                                                        |
|-----|---------|---------------------------------------------------------------------------------------------------------------------------------------------------------------------------------------------------------------------------------------------------------------------------------------------------------------------------------------------------------------------------------------------------------------------------------------------------------------------------------------------------------------------------------------------------------------------------------------------------------------------------------------------------------------------------------------------------------------------------------------------------------------------------------------------------------------------------------------------------------------------------------------------------------------------------------------------------------------------------------------------------------------------------------------------------------------------------------------------------------------------------------------------------------------------------------------------------------------------------------------------------------------------------------------------------------------------------------------------------------------------------------------------------------------------------------------------------------------------------------------------------------------------------------------------------------------------------------------------------------------------------------------------------------------------------------------------------------------------------------|--------------------|---------------------------------------------------------------|------------------------------------------------------------------------------------|
| # 3 | 145     | <p>(TS=(mortality OR morbidity OR death OR died or fatal* or complicat* or meningitis or arthritis or abscess or pneumon* or shock or relapse or recurr* or splen* ) AND (TS=(nontyph* OR non-typh* OR "iNTS" OR "salmonella group" OR "salmonellosis" OR typhimurium OR enteritidis) OR TS=(salmonella AND Heidelberg) OR TS=(salmonella AND Dublin) OR TS=(salmonella AND Choleraesuis) OR TS=(salmonella AND Newport) OR TS=(salmonella AND Virchow) OR TS=(salmonella AND Concord) OR TS=(salmonella AND Brancaster) OR TS=(salmonella AND "freetown") OR TS=(salmonella AND "Infantis") OR TS=(salmonella AND Isangi)) NOT (TS=(extract* OR carcass* OR cell OR mouse OR rat OR rodent* OR bat OR bats OR cattle) )</p> <p><b>Refined by:</b> [excluding] <b>RESEARCH AREAS:</b> ( GENETICS HEREDITY OR VETERINARY SCIENCES OR ZOOLOGY OR ENDOCRINOLOGY METABOLISM OR MATHEMATICS OR PLANT SCIENCES OR BUSINESS ECONOMICS OR DERMATOLOGY OR BIOPHYSICS OR MATHEMATICAL COMPUTATIONAL BIOLOGY OR ENGINEERING OR COMPUTER SCIENCE OR MARINE FRESHWATER BIOLOGY OR MATERIALS SCIENCE OR BIODIVERSITY CONSERVATION OR PHYSICS OR METEOROLOGY ATMOSPHERIC SCIENCES OR ANTHROPOLOGY OR GOVERNMENT LAW OR LEGAL MEDICINE OR EDUCATION EDUCATIONAL RESEARCH OR SUBSTANCE ABUSE OR PSYCHIATRY OR POLYMER SCIENCE OR HISTORY OR ELECTROCHEMISTRY OR FORESTRY OR SPORT SCIENCES OR FISHERIES OR GEOGRAPHY OR PUBLIC ADMINISTRATION OR ENERGY FUELS OR INTERNATIONAL RELATIONS ) AND [excluding] <b>DOCUMENT TYPES:</b> ( ABSTRACT OR LETTER OR MEETING OR EDITORIAL OR BOOK OR PATENT OR NEWS OR REPORT )</p> <p>Databases= WOS, BCI, CCC, INSPEC, KJD, MEDLINE, RSCI, SCIELO, ZOOREC Timespan=2020-2021<br/>Search language=Auto</p> |                    | <input type="radio"/> AND <input type="radio"/> OR<br>Combine | <input type="button" value="Select All"/><br><input type="button" value="Delete"/> |
| # 2 | 151     | <p>(TS=(mortality OR morbidity OR death OR died or fatal* or complicat* or meningitis or arthritis or abscess or pneumon* or shock or relapse or recurr* or splen* ) AND (TS=(nontyph* OR non-typh* OR "iNTS" OR "salmonella group" OR "salmonellosis" OR typhimurium OR enteritidis) OR TS=(salmonella AND Heidelberg) OR TS=(salmonella AND Dublin) OR TS=(salmonella AND Choleraesuis) OR TS=(salmonella AND Newport) OR TS=(salmonella AND Virchow) OR TS=(salmonella AND Concord) OR TS=(salmonella AND Brancaster) OR TS=(salmonella AND "freetown") OR TS=(salmonella AND "Infantis") OR TS=(salmonella AND Isangi)) NOT (TS=(extract* OR carcass* OR cell OR mouse OR rat OR rodent* OR bat OR bats OR cattle) )</p> <p><b>Refined by:</b> [excluding] <b>RESEARCH AREAS:</b> ( GENETICS HEREDITY OR VETERINARY SCIENCES OR ZOOLOGY OR ENDOCRINOLOGY METABOLISM OR MATHEMATICS OR PLANT SCIENCES OR BUSINESS ECONOMICS OR DERMATOLOGY OR BIOPHYSICS OR MATHEMATICAL COMPUTATIONAL BIOLOGY OR ENGINEERING OR COMPUTER SCIENCE OR MARINE FRESHWATER BIOLOGY OR MATERIALS SCIENCE OR BIODIVERSITY CONSERVATION OR PHYSICS OR METEOROLOGY ATMOSPHERIC SCIENCES OR ANTHROPOLOGY OR GOVERNMENT LAW OR LEGAL MEDICINE OR EDUCATION EDUCATIONAL RESEARCH OR SUBSTANCE ABUSE OR PSYCHIATRY OR POLYMER SCIENCE OR HISTORY OR ELECTROCHEMISTRY OR FORESTRY OR SPORT SCIENCES OR FISHERIES OR GEOGRAPHY OR PUBLIC ADMINISTRATION OR ENERGY FUELS OR INTERNATIONAL RELATIONS )</p> <p>Databases= WOS, BCI, CCC, INSPEC, KJD, MEDLINE, RSCI, SCIELO, ZOOREC Timespan=2020-2021<br/>Search language=Auto</p>                                                                                                                           |                    | <input type="radio"/> AND <input type="radio"/> OR<br>Combine | <input type="button" value="Select All"/><br><input type="button" value="Delete"/> |
| # 1 | 291     | <p>(TS=(mortality OR morbidity OR death OR died or fatal* or complicat* or meningitis or arthritis or abscess or pneumon* or shock or relapse or recurr* or splen* ) AND (TS=(nontyph* OR non-typh* OR "iNTS" OR "salmonella group" OR "salmonellosis" OR typhimurium OR enteritidis) OR TS=(salmonella AND Heidelberg) OR TS=(salmonella AND Dublin) OR TS=(salmonella AND Choleraesuis) OR TS=(salmonella AND Newport) OR TS=(salmonella AND Virchow) OR TS=(salmonella AND Concord) OR TS=(salmonella AND Brancaster) OR TS=(salmonella AND "freetown") OR TS=(salmonella AND "Infantis") OR TS=(salmonella AND Isangi)) NOT (TS=(extract* OR carcass* OR cell OR mouse OR rat OR rodent* OR bat OR bats OR cattle) )</p> <p>Databases= WOS, BCI, CCC, INSPEC, KJD, MEDLINE, RSCI, SCIELO, ZOOREC Timespan=2020-2021<br/>Search language=Auto</p>                                                                                                                                                                                                                                                                                                                                                                                                                                                                                                                                                                                                                                                                                                                                                                                                                                                                            |                    | <input type="radio"/> AND <input type="radio"/> OR<br>Combine | <input type="button" value="Select All"/><br><input type="button" value="Delete"/> |

# Embase Classic+Embase (1947 to 2020 May 21) + Ovid MEDLINE and Epub Ahead of Print, In-Process, In-Data-Review & Other Non-Indexed Citations, Daily and Versions (2020 to June 4, 2021)

Ovid® My Account OvidPV University of Otago Library Help Feedback Logged in as Christian Marchello Logoff [Electronic Access Help](#)

**Search** Journals Books Multimedia My Workspace What's New

▼ Search History (43) View Saved

| <input type="checkbox"/> | # ▲ | Searches                                                                                                                                                                                                                                                                                                                                                                                                                                                | Results  | Type     | Actions                | Annotations              |
|--------------------------|-----|---------------------------------------------------------------------------------------------------------------------------------------------------------------------------------------------------------------------------------------------------------------------------------------------------------------------------------------------------------------------------------------------------------------------------------------------------------|----------|----------|------------------------|--------------------------|
| <input type="checkbox"/> | 1   | ▶ (salmonella and typhimurium).af.                                                                                                                                                                                                                                                                                                                                                                                                                      | 83916    | Advanced | Display Results More ▼ | <input type="checkbox"/> |
| <input type="checkbox"/> | 2   | ▶ (salmonella and enteritidis).af.                                                                                                                                                                                                                                                                                                                                                                                                                      | 18591    | Advanced | Display Results More ▼ | <input type="checkbox"/> |
| <input type="checkbox"/> | 3   | ▶ (salmonella and Heidelberg).af.                                                                                                                                                                                                                                                                                                                                                                                                                       | 2638     | Advanced | Display Results More ▼ | <input type="checkbox"/> |
| <input type="checkbox"/> | 4   | ▶ (salmonella and Dublin).af.                                                                                                                                                                                                                                                                                                                                                                                                                           | 3063     | Advanced | Display Results More ▼ | <input type="checkbox"/> |
| <input type="checkbox"/> | 5   | ▶ (salmonella and Choleraesuis).af.                                                                                                                                                                                                                                                                                                                                                                                                                     | 1946     | Advanced | Display Results More ▼ | <input type="checkbox"/> |
| <input type="checkbox"/> | 6   | ▶ (salmonella and newport).af.                                                                                                                                                                                                                                                                                                                                                                                                                          | 1671     | Advanced | Display Results More ▼ | <input type="checkbox"/> |
| <input type="checkbox"/> | 7   | ▶ (salmonella and virchow).af.                                                                                                                                                                                                                                                                                                                                                                                                                          | 920      | Advanced | Display Results More ▼ | <input type="checkbox"/> |
| <input type="checkbox"/> | 8   | ▶ (salmonella and concord).af.                                                                                                                                                                                                                                                                                                                                                                                                                          | 84       | Advanced | Display Results More ▼ | <input type="checkbox"/> |
| <input type="checkbox"/> | 9   | ▶ (salmonella and Brancaster).af.                                                                                                                                                                                                                                                                                                                                                                                                                       | 36       | Advanced | Display Results More ▼ | <input type="checkbox"/> |
| <input type="checkbox"/> | 10  | ▶ (salmonella and Freetown).af.                                                                                                                                                                                                                                                                                                                                                                                                                         | 15       | Advanced | Display Results More ▼ | <input type="checkbox"/> |
| <input type="checkbox"/> | 11  | ▶ (salmonella and infantis).af.                                                                                                                                                                                                                                                                                                                                                                                                                         | 1909     | Advanced | Display Results More ▼ | <input type="checkbox"/> |
| <input type="checkbox"/> | 12  | ▶ (salmonella and Isangi).af.                                                                                                                                                                                                                                                                                                                                                                                                                           | 77       | Advanced | Display Results More ▼ | <input type="checkbox"/> |
| <input type="checkbox"/> | 13  | ▶ remove duplicates from 3                                                                                                                                                                                                                                                                                                                                                                                                                              | 2009     | Advanced | Display Results More ▼ | <input type="checkbox"/> |
| <input type="checkbox"/> | 14  | ▶ remove duplicates from 4                                                                                                                                                                                                                                                                                                                                                                                                                              | 1905     | Advanced | Display Results More ▼ | <input type="checkbox"/> |
| <input type="checkbox"/> | 15  | ▶ remove duplicates from 5                                                                                                                                                                                                                                                                                                                                                                                                                              | 1225     | Advanced | Display Results More ▼ | <input type="checkbox"/> |
| <input type="checkbox"/> | 16  | ▶ remove duplicates from 6                                                                                                                                                                                                                                                                                                                                                                                                                              | 1070     | Advanced | Display Results More ▼ | <input type="checkbox"/> |
| <input type="checkbox"/> | 17  | ▶ remove duplicates from 7                                                                                                                                                                                                                                                                                                                                                                                                                              | 579      | Advanced | Display Results More ▼ | <input type="checkbox"/> |
| <input type="checkbox"/> | 18  | ▶ remove duplicates from 8                                                                                                                                                                                                                                                                                                                                                                                                                              | 56       | Advanced | Display Results More ▼ | <input type="checkbox"/> |
| <input type="checkbox"/> | 19  | ▶ remove duplicates from 9                                                                                                                                                                                                                                                                                                                                                                                                                              | 22       | Advanced | Display Results More ▼ | <input type="checkbox"/> |
| <input type="checkbox"/> | 20  | ▶ remove duplicates from 10                                                                                                                                                                                                                                                                                                                                                                                                                             | 11       | Advanced | Display Results More ▼ | <input type="checkbox"/> |
| <input type="checkbox"/> | 21  | ▶ remove duplicates from 11                                                                                                                                                                                                                                                                                                                                                                                                                             | 1250     | Advanced | Display Results More ▼ | <input type="checkbox"/> |
| <input type="checkbox"/> | 22  | ▶ remove duplicates from 12                                                                                                                                                                                                                                                                                                                                                                                                                             | 46       | Advanced | Display Results More ▼ | <input type="checkbox"/> |
| <input type="checkbox"/> | 23  | ▶ 1 or 2 or 13 or 14 or 15 or 16 or 17 or 18 or 19 or 20 or 21 or 22                                                                                                                                                                                                                                                                                                                                                                                    | 101209   | Advanced | Display Results More ▼ | <input type="checkbox"/> |
| <input type="checkbox"/> | 24  | ▶ nontyph*.af.                                                                                                                                                                                                                                                                                                                                                                                                                                          | 1981     | Advanced | Display Results More ▼ | <input type="checkbox"/> |
| <input type="checkbox"/> | 25  | ▶ non-typh*.af.                                                                                                                                                                                                                                                                                                                                                                                                                                         | 3143     | Advanced | Display Results More ▼ | <input type="checkbox"/> |
| <input type="checkbox"/> | 26  | ▶ salmonellosis.af.                                                                                                                                                                                                                                                                                                                                                                                                                                     | 31629    | Advanced | Display Results More ▼ | <input type="checkbox"/> |
| <input type="checkbox"/> | 27  | ▶ "INTS".af.                                                                                                                                                                                                                                                                                                                                                                                                                                            | 2342     | Advanced | Display Results More ▼ | <input type="checkbox"/> |
| <input type="checkbox"/> | 28  | ▶ (salmonella adj7 group).af.                                                                                                                                                                                                                                                                                                                                                                                                                           | 2862     | Advanced | Display Results More ▼ | <input type="checkbox"/> |
| <input type="checkbox"/> | 29  | ▶ remove duplicates from 24                                                                                                                                                                                                                                                                                                                                                                                                                             | 1209     | Advanced | Display Results More ▼ | <input type="checkbox"/> |
| <input type="checkbox"/> | 30  | ▶ remove duplicates from 25                                                                                                                                                                                                                                                                                                                                                                                                                             | 1982     | Advanced | Display Results More ▼ | <input type="checkbox"/> |
| <input type="checkbox"/> | 31  | ▶ remove duplicates from 27                                                                                                                                                                                                                                                                                                                                                                                                                             | 1704     | Advanced | Display Results More ▼ | <input type="checkbox"/> |
| <input type="checkbox"/> | 32  | ▶ remove duplicates from 28                                                                                                                                                                                                                                                                                                                                                                                                                             | 1912     | Advanced | Display Results More ▼ | <input type="checkbox"/> |
| <input type="checkbox"/> | 33  | ▶ 23 or 26 or 29 or 30 or 31 or 32                                                                                                                                                                                                                                                                                                                                                                                                                      | 123853   | Advanced | Display Results More ▼ | <input type="checkbox"/> |
| <input type="checkbox"/> | 34  | ▶ limit 33 to human                                                                                                                                                                                                                                                                                                                                                                                                                                     | 37763    | Advanced | Display Results More ▼ | <input type="checkbox"/> |
| <input type="checkbox"/> | 35  | ▶ limit 34 to journal (Limit not valid in Ovid MEDLINE(R), Ovid MEDLINE(R) Daily Update, Ovid MEDLINE(R) PubMed not MEDLINE, Ovid MEDLINE(R) In-Process, Ovid MEDLINE(R) Publisher; records were retained)                                                                                                                                                                                                                                              | 37613    | Advanced | Display Results More ▼ | <input type="checkbox"/> |
| <input type="checkbox"/> | 36  | ▶ (mortality or morbidity or death or died or fatal* or complicat* or meningitis or arthritis or abscess or pneumonia* or shock or relapse or recur* or splen*).af.                                                                                                                                                                                                                                                                                     | 14208986 | Advanced | Display Results More ▼ | <input type="checkbox"/> |
| <input type="checkbox"/> | 37  | ▶ limit 36 to human                                                                                                                                                                                                                                                                                                                                                                                                                                     | 11454025 | Advanced | Display Results More ▼ | <input type="checkbox"/> |
| <input type="checkbox"/> | 38  | ▶ limit 37 to journal (Limit not valid in Ovid MEDLINE(R), Ovid MEDLINE(R) Daily Update, Ovid MEDLINE(R) PubMed not MEDLINE, Ovid MEDLINE(R) In-Process, Ovid MEDLINE(R) Publisher; records were retained)                                                                                                                                                                                                                                              | 11434306 | Advanced | Display Results More ▼ | <input type="checkbox"/> |
| <input type="checkbox"/> | 39  | ▶ (35 and 38) not (extract* or carcass* or cell or mouse or rat or rodent*) or bat or bats or cattle or papillomavirus or "HPV" or aquatic or marine or wild* or "pet" or "pets").af.                                                                                                                                                                                                                                                                   | 7330     | Advanced | Display Results More ▼ | <input type="checkbox"/> |
| <input type="checkbox"/> | 40  | ▶ limit 39 to (article or clinical study) or clinical trial; all or clinical trial, phase I or clinical trial, phase II or clinical trial, phase III or clinical trial, phase IV or journal article or observational study or randomized controlled trial) (Limit not valid in Embase, Ovid MEDLINE(R), Ovid MEDLINE(R) Daily Update, Ovid MEDLINE(R) PubMed not MEDLINE, Ovid MEDLINE(R) In-Process, Ovid MEDLINE(R) Publisher; records were retained) | 5736     | Advanced | Display Results More ▼ | <input type="checkbox"/> |
| <input type="checkbox"/> | 41  | ▶ limit 40 to abstracts                                                                                                                                                                                                                                                                                                                                                                                                                                 | 4280     | Advanced | Display Results More ▼ | <input type="checkbox"/> |
| <input type="checkbox"/> | 42  | ▶ remove duplicates from 41                                                                                                                                                                                                                                                                                                                                                                                                                             | 3392     | Advanced | Display Results More ▼ | <input type="checkbox"/> |
| <input type="checkbox"/> | 43  | ▶ limit 42 to yr=2020 -Current*                                                                                                                                                                                                                                                                                                                                                                                                                         | 146      | Advanced | Display Results More ▼ | <input type="checkbox"/> |

Save Remove Combine with: AND OR Deduplicate

Save All Edit Create RSS View Saved Email All Search History Copy Search History Link Copy Search History Details



## Supplementary Appendix C - iNTS mortality systematic review data abstraction

# iNTS mortality systematic review data abstraction

\* Required

1. Name of reviewer \*

*Mark only one oval.*

Christian Marchello

Megan Birkhold

John Crump

2. First author's last name \*

---

3. Publication year \*

---

4. PubMed ID \*

---

*Skip to question 5*

Study characteristics

5. Study country \*

---

6. Study locality (city, district, or province) \*

---

7. UN region \*

<https://unstats.un.org/unsd/methodology/m49/>

Mark only one oval.

- Africa Skip to question 13
- Americas Skip to question 14
- Asia Skip to question 15
- Europe Skip to question 16
- Oceania Skip to question 17

Study characteristics

8. Study setting \*

Mark only one oval.

- Hospital-based
- Community-based
- Laboratory-based
- National surveillance
- Other: \_\_\_\_\_

9. Date data collection began \*

If no specific day provided, use the first of the month; if only a year is provided, enter January 1

\_\_\_\_\_  
*Example: January 7, 2019*

10. Date data collection ended \*

If no specific day provided, use the last day of the month; if only a year is provided, enter December 31

\_\_\_\_\_  
*Example: January 7, 2019*

11. Normally sterile site cultured \*

*Check all that apply.*

- Blood
- Bone marrow
- CSF
- Abscess
- Synovial fluid

Other:  \_\_\_\_\_

12. Inclusion age group \*

Based on inclusion criteria or age range data provided in results

*Mark only one oval.*

- Children only (<=15y)
- Adults only (>15y)
- Mixed ages

*Skip to question 18*

Africa sub-regions

13.

*Mark only one oval.*

- Eastern Africa
- Middle Africa
- Northern Africa
- Southern Africa
- Western Africa

*Skip to question 8*

Americas sub-regions

14. *Mark only one oval.*

- Caribbean
- Central America
- Northern America
- South America

*Skip to question 8*

#### Asia sub-regions

15. *Mark only one oval.*

- Central Asia
- Eastern Asia
- South-eastern Asia
- Southern Asia
- Western Asia

*Skip to question 8*

#### Europe sub-regions

16. *Mark only one oval.*

- Eastern Europe
- Northern Europe
- Southern Europe
- Western Europe

*Skip to question 8*

#### Oceania sub-regions



17. *Mark only one oval.*

- Australia and New Zealand
- Melanesia
- Micronesia
- Polynesia

*Skip to question 8*

Exclude

Should article be excluded after reviewing the data?

18. Exclude?

*Mark only one oval.*

- Yes *Skip to question 52*
- No *Skip to question 19*

Mortality data

19. Is data on mortality provided?

*Mark only one oval.*

- Yes *Skip to question 20*
- No *Skip to question 37*

*Skip to question 19*

Mortality data

20. Which NTS serovar is mortality data available? \*

*Mark only one oval.*

- NTS only (does not stratify by serovar) *Skip to question 21*
- Salmonella Typhimurium *Skip to question 23*
- Salmonella Enteritidis *Skip to question 25*
- Salmonella Heidelberg *Skip to question 27*
- Salmonella Dublin *Skip to question 29*
- Salmonella Newport *Skip to question 31*
- Salmonella Choleraesuis *Skip to question 33*
- Other *Skip to question 35*

**Mortality data**

21. Cases of NTS only (does not stratify by serovar)

Number cultured from normally sterile sites

---

---

---

---

---

22. Number of deaths with NTS

---

---

---

---

---

*Skip to question 37*

**Mortality data**

23. Cases of Salmonella Typhimurium

Number cultured from normally sterile sites

---

24. Number of deaths with Salmonella Typhimurium

---

*Skip to question 37*

**Mortality data**

25. Cases of Salmonella Enteritidis

Number cultured from normally sterile sites

---

26. Number of deaths with Salmonella Enteritidis

---

*Skip to question 37*

**Mortality data**

27. Cases of Salmonella Heidelberg

Number cultured from normally sterile sites

---

28. Number of deaths with Salmonella Heidelberg

---

*Skip to question 37*

**Mortality data**

29. Cases of Salmonella Dublin  
Number cultured from normally sterile sites

---

30. Number of deaths with Salmonella Dublin

---

*Skip to question 37*

### Mortality data

31. Cases of Salmonella Newport  
Number cultured from normally sterile sites

---

32. Number of deaths with Salmonella Newport

---

*Skip to question 37*

### Mortality Data

33. Cases of Salmonella Choleraesuis  
Number cultured from normally sterile sites

---

34. Number of deaths with Salmonella Choleraesuis

---

*Skip to question 37*

### Mortality data

35. Cases of other non-typhoidal Salmonella

Specify serovar and number cultured from normally sterile sites

---

---

---

---

---

36. Number of deaths with other NTS

---

---

---

---

---

*Skip to question 37*

Complications data

37. Is data on complications provided?

*Mark only one oval.*

Yes    *Skip to question 38*

No    *Skip to question 39*

Complications  
data

Match serovar used in mortality data. If no mortality data, list serovar.  
Document meningitis, abscess, osteomyelitis, other focal infections, and  
relapse even if not described by authors as a complication



38. Complications

Complication 1 (number/total culture confirmed cases); Complication 2

---

---

---

---

---

HIV data

39. Is mortality stratified by HIV status?

*Mark only one oval.*

- Yes    *Skip to question 41*
- No    *Skip to question 40*

Malaria data

40. Is mortality stratified by malaria status?

*Mark only one oval.*

- Yes    *Skip to question 46*
- No    *Skip to question 51*

HIV data

41. HIV confirmation method

*Check all that apply.*

- Molecular (PCR, nucleic acid)
- Serology
- Not provided

42. Cases of NTS+ and HIV+

---

43. NTS+ and HIV+ deaths

---

44. Cases of NTS+ and HIV-

---

45. NTS+ and HIV- deaths

---

*Skip to question 40*

#### Malaria data

46. Malaria confirmation method

*Check all that apply.*

- Microscopic (thin or thick blood smear)
- Serology (includes RDT)
- Molecular
- Not provided

47. Cases of NTS+ and malaria+

---

48. NTS+ and malaria+ deaths

---

49. Cases of NTS+ and malaria-

---

50. NTS+ and malaria- deaths

---

Scan of reference list

51. List of references needing check

Based on context in which citation was used and the title of article

---

---

---

---

---

Notes

52. Notes on the article, if necessary

---

---

---

---

---

---

This content is neither created nor endorsed by Google.

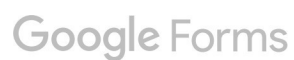



|                              |                                                                                                                                                                                                    |                                                                                                                                                        |                                                                                                                                     |
|------------------------------|----------------------------------------------------------------------------------------------------------------------------------------------------------------------------------------------------|--------------------------------------------------------------------------------------------------------------------------------------------------------|-------------------------------------------------------------------------------------------------------------------------------------|
| Patient follow up (L/H/U)    | Were patients lost to follow up and was an appropriate follow up period defined for attributing a death to NTS                                                                                     | All patients were followed and the period for ascertaining mortality was <=7 days or authors explicitly describe deaths are directly attributed to NTS | Loss to follow up and mortality period was either >7 days (e.g. 30-day mortality) or unclear in whether a death was a result of NTS |
| Microbiology methods (L/H/U) | Were microbiology methods fully presented, including blood culture volume and contamination. Clearly defined how infection was attributed to NTS and not Salmonella Typhi or Paratyphi A, B, or C. | Appropriate microbiological methods presented for ruling out typhoidal serotypes. Described blood culture volume and contamination.                    | Unclear or unconventional microbiological methods. No information on blood culture volumes and contamination.                       |

**Domain subtotal**

- 0 of 3 H risk
- 1 of 3 H risk
- >1 H risk

**Overall risk of bias**

- Both subtotals low risk
- 1 of 2 high risk
- Both subtotals high risk



**Supplementary Appendix D2. Bias assessment scores**

| Author      | Year | PubMed ID | Selection and recruitment |                       |                           |                                       | Domain subtotal | Measurement and reporting bias       |                           |                              | Domain subtotal | Overall assessment of risk of bias (L/M/H) |
|-------------|------|-----------|---------------------------|-----------------------|---------------------------|---------------------------------------|-----------------|--------------------------------------|---------------------------|------------------------------|-----------------|--------------------------------------------|
|             |      |           | Study design (L/H/U)      | Study setting (L/H/U) | Patient selection (L/H/U) | Final year of data collection (L/M/H) |                 | Definition for complications (L/H/U) | Patient follow up (L/H/U) | Microbiology methods (L/H/U) |                 |                                            |
| Abu         | 2016 | 27495884  | H                         | H                     | H                         | L                                     | H               | U                                    | H                         | L                            | H               | H                                          |
| Alausa      | 1977 | 410093    | L                         | H                     | H                         | H                                     | H               | U                                    | H                         | H                            | H               | H                                          |
| Albert      | 2019 | 30986214  | L                         | H                     | L                         | L                                     | M               | U                                    | H                         | H                            | M               | M                                          |
| Appiah      | 2021 | 33999850  | L                         | H                     | H                         | L                                     | H               | U                                    | H                         | L                            | M               | M                                          |
| Bar-Meir    | 2005 | 16008618  | H                         | H                     | H                         | M                                     | H               | L                                    | L                         | H                            | M               | H                                          |
| Bassa       | 1989 | 2689346   | H                         | H                     | L                         | H                                     | H               | L                                    | L                         | H                            | M               | H                                          |
| Bassat      | 2009 | 19552643  | H                         | H                     | H                         | M                                     | H               | U                                    | H                         | H                            | H               | H                                          |
| Blomberg    | 2007 | 17519011  | L                         | H                     | H                         | M                                     | H               | U                                    | H                         | L                            | H               | H                                          |
| Brent       | 2006 | 16511385  | L                         | H                     | H                         | M                                     | H               | L                                    | L                         | H                            | M               | H                                          |
| Chen        | 2007 | 17222172  | H                         | H                     | H                         | M                                     | H               | L                                    | H                         | H                            | H               | H                                          |
| Chen        | 2018 | 29526450  | H                         | H                     | H                         | L                                     | H               | H                                    | H                         | H                            | H               | H                                          |
| Chou        | 2016 | 26316009  | H                         | H                     | H                         | L                                     | H               | H                                    | H                         | H                            | H               | H                                          |
| Ciftci      | 2004 | 15005970  | H                         | H                     | H                         | M                                     | H               | U                                    | H                         | H                            | H               | H                                          |
| Diez Dorado | 2004 | 15033112  | H                         | H                     | H                         | M                                     | H               | L                                    | H                         | H                            | H               | H                                          |
| Emary       | 2012 | 23122884  | H                         | H                     | H                         | L                                     | H               | L                                    | L                         | H                            | M               | M                                          |
| Falay       | 2016 | 27286886  | L                         | H                     | H                         | L                                     | H               | H                                    | H                         | H                            | H               | H                                          |
| Feasey      | 2014 | 24643091  | L                         | H                     | H                         | L                                     | H               | U                                    | L                         | L                            | L               | M                                          |
| Galanakis   | 2007 | 16564718  | L                         | H                     | H                         | M                                     | H               | U                                    | L                         | H                            | H               | H                                          |
| Georgilis   | 1997 | None      | H                         | H                     | L                         | H                                     | H               | U                                    | L                         | H                            | H               | H                                          |
| Gilks       | 1990 | 1975046   | L                         | H                     | H                         | H                                     | H               | U                                    | H                         | L                            | H               | H                                          |
| Gordon      | 2001 | 11243753  | L                         | H                     | H                         | H                                     | H               | U                                    | L                         | L                            | L               | M                                          |
| Gradel      | 2006 | 16534567  | H                         | H                     | L                         | M                                     | H               | U                                    | H                         | H                            | H               | H                                          |
| Graham      | 2000 | 10975008  | L                         | H                     | H                         | H                                     | H               | U                                    | H                         | H                            | H               | H                                          |
| Green       | 1993 | 7681645   | L                         | H                     | H                         | H                                     | H               | H                                    | L                         | L                            | M               | H                                          |



|                |      |          |   |   |   |   |   |   |   |   |   |   |   |
|----------------|------|----------|---|---|---|---|---|---|---|---|---|---|---|
| Raucher        | 1983 | 6883890  | L | L | H | H | M | L | L | L | H | H | M |
| Roberts        | 1993 | 8508819  | H | H | L | L | H | H | L | H | H | H | H |
| Rongkavilit    | 2000 | 10693998 | H | H | H | H | H | H | H | H | H | H | H |
| Ruiz-Contreras | 1995 | 7667058  | H | H | H | H | H | L | L | L | L | L | H |
| Secmeer        | 1995 | 7502360  | H | H | H | H | H | H | H | H | H | H | H |
| Seydi          | 2005 | 15695029 | H | H | L | L | H | H | H | H | H | H | H |
| Seydi          | 2008 | 18093773 | H | H | L | L | H | H | H | H | H | H | H |
| Shahunja       | 2020 | 33264364 | H | H | H | L | H | H | L | L | L | L | M |
| Shahunja       | 2015 | 26361076 | H | H | L | L | H | H | L | L | L | L | H |
| Shimoni        | 1999 | 10825045 | H | H | L | L | H | H | L | L | L | L | M |
| Shkalim        | 2012 | 22161258 | H | H | H | H | H | H | L | L | L | L | M |
| Sigauque       | 2009 | 19131902 | L | H | H | H | H | H | H | L | L | L | H |
| Sirinavin      | 1999 | 10524956 | H | H | H | H | H | H | H | H | H | H | H |
| Still          | 2020 | 32725229 | L | H | H | H | H | H | L | L | L | L | M |
| Tabu           | 2012 | 22363591 | L | L | L | L | L | L | L | L | L | L | M |
| Tack           | 2020 | 32240161 | L | L | L | L | L | L | L | L | L | L | M |
| Thamlikitkul   | 1996 | 8765451  | H | H | H | H | H | H | H | H | H | H | H |
| Tsai           | 2007 | 17901796 | H | H | H | H | H | H | L | L | L | L | H |
| Vaagland       | 2004 | 15367335 | L | H | H | H | H | H | L | L | L | L | H |
| Vandenbergh    | 2010 | 20104200 | H | H | H | H | H | H | L | L | L | L | H |
| Verani         | 2015 | 26449945 | L | L | L | L | L | L | L | L | L | L | M |
| Vlieghe        | 2012 | 23272255 | L | L | H | H | H | H | H | H | H | H | H |
| Walsh          | 2000 | 10783021 | L | L | H | H | H | H | H | H | H | H | H |
| Wang           | 2006 | 16569283 | H | H | H | H | H | H | H | H | H | H | H |
| Yen            | 2007 | 17639163 | H | H | L | L | H | H | L | L | L | L | H |
| Yen            | 2009 | 19686996 | L | L | H | H | H | H | H | H | H | H | H |
| Yombi          | 2015 | 25819116 | H | H | L | L | H | H | L | L | L | L | H |
| Zaidi          | 1999 | 10608627 | H | H | H | H | H | H | L | L | L | L | H |

Supplementary Table S1 - study characteristics of included articles

| First author's last name | Publication year | PubMed ID | Study country                    | Study locality (city, district, or province)   | UN region | UN sub-region*     | Study setting         | Date data collection began | Date data collection ended |
|--------------------------|------------------|-----------|----------------------------------|------------------------------------------------|-----------|--------------------|-----------------------|----------------------------|----------------------------|
| Abu                      | 2016             | 27495884  | Malaysia                         | Gombak District                                | Asia      | South-eastern Asia | Hospital-based        | 1-Jan-2001                 | 31-Dec-2011                |
| Alausa                   | 1977             | 410093    | Nigeria                          | Ibadan                                         | Africa    | Western Africa     | Hospital-based        | 1-Jan-1976                 | 30-Jun-1976                |
| Albert                   | 2019             | 30986214  | Kuwait                           | Kuwait City                                    | Asia      | Western Asia       | Hospital-based        | 1-Apr-2013                 | 31-May-2016                |
| Appiah                   | 2021             | 33999850  | Uganda                           | Apac, Tororo, Arua, Kabale, Jinja, and Mubende | Africa    | Eastern Africa     | Hospital-based        | 1-Jul-2016                 | 31-Jan-2019                |
| Bar-Meir                 | 2005             | 16008618  | Israel                           | Jerusalem                                      | Asia      | Western Asia       | Hospital-based        | 1-Jan-1990                 | 31-Dec-2001                |
| Bassa                    | 1989             | 2689346   | Spain                            | Palma de Mallorca                              | Europe    | Southern Europe    | Hospital-based        | 1-Jan-1979                 | 30-Apr-1988                |
| Bassat                   | 2009             | 19552643  | Mozambique                       | Manhiça                                        | Africa    | Eastern Africa     | Hospital-based        | 1-Jun-2003                 | 31-May-2007                |
| Blomberg                 | 2007             | 17519011  | Tanzania                         | Dar es Salaam                                  | Africa    | Eastern Africa     | Hospital-based        | 1-Aug-2001                 | 31-Aug-2002                |
| Brent                    | 2006             | 16511385  | Kenya                            | Kilifi                                         | Africa    | Eastern Africa     | Hospital-based        | 1-Aug-1998                 | 31-Jul-2002                |
| Chen                     | 2007             | 17222172  | Taiwan                           | Tainan                                         | Asia      | Eastern Asia       | Hospital-based        | 1-Jan-1999                 | 30-Jun-2005                |
| Chen                     | 2018             | 29526450  | Taiwan                           | Taipei                                         | Asia      | Eastern Asia       | Hospital-based        | 1-Jan-2013                 | 30-Jun-2015                |
| Chou                     | 2016             | 26316009  | Taiwan                           | Taipei and New Taipei City                     | Asia      | Eastern Asia       | Hospital-based        | 1-Jan-2006                 | 30-Jun-2014                |
| Ciftci                   | 2004             | 15005970  | Turkey                           | Ankara                                         | Asia      | Western Asia       | Hospital-based        | 1-Jan-1993                 | 31-Dec-2002                |
| Diez Dorado              | 2004             | 15033112  | Spain                            | Madrid                                         | Europe    | Southern Europe    | Hospital-based        | 1-Jan-1992                 | 31-Dec-2002                |
| Emary                    | 2012             | 23122884  | Cambodia                         | Siem Reap                                      | Asia      | South-eastern Asia | Hospital-based        | 1-Jan-2007                 | 31-Dec-2011                |
| Falay                    | 2016             | 27286886  | Democratic Republic of the Congo | Oriental Province                              | Africa    | Middle Africa      | Hospital-based        | 1-May-2009                 | 31-May-2014                |
| Feasey                   | 2014             | 24643091  | Malawi                           | Blantyre                                       | Africa    | Eastern Africa     | Hospital-based        | 1-Jan-2009                 | 31-Dec-2010                |
| Galanakis                | 2007             | 16564718  | Greece                           | Heraklion                                      | Europe    | Southern Europe    | Hospital-based        | 1-Jan-1993                 | 31-Dec-2002                |
| Georgilis                | 1997             | None      | Greece                           | Athens                                         | Europe    | Southern Europe    | Hospital-based        | 1-Jan-1987                 | 31-Dec-1996                |
| Gilks                    | 1990             | 1975046   | Kenya                            | Nairobi                                        | Africa    | Eastern Africa     | Hospital-based        | 30-Nov-1988                | 15-May-1989                |
| Gordon                   | 2001             | 11243753  | Malawi                           | Blantyre                                       | Africa    | Eastern Africa     | Hospital-based        | 1-Dec-1997                 | 30-Nov-1998                |
| Gradel                   | 2006             | 16534567  | Denmark                          | North Jutland County                           | Europe    | Northern Europe    | National surveillance | 1-Jan-1994                 | 31-Dec-2003                |

|            |      |          |                                  |                  |          |                    |                       |             |             |
|------------|------|----------|----------------------------------|------------------|----------|--------------------|-----------------------|-------------|-------------|
| Graham     | 2000 | 10975008 | Malawi                           | Blantyre         | Africa   | Eastern Africa     | Hospital-based        | 14-Feb-1996 | 30-Apr-1998 |
| Green      | 1993 | 7681645  | Democratic Republic of the Congo | Kimpese          | Africa   | Middle Africa      | Hospital-based        | 1-Jan-1982  | 31-Dec-1986 |
| Guiraud    | 2017 | 28692655 | Burkina Faso                     | Nanoro           | Africa   | Western Africa     | Hospital-based        | 13-May-2013 | 12-May-2014 |
| Habib      | 2004 | 15608832 | Singapore                        | Singapore        | Asia     | South-eastern Asia | Hospital-based        | 1-Apr-2001  | 31-Mar-2003 |
| Hsu        | 2004 | 15599326 | Taiwan                           | Taipei           | Asia     | Eastern Asia       | Hospital-based        | 1-Sep-1984  | 31-Dec-2003 |
| Hsu        | 2005 | 16203825 | Taiwan                           | Taipei           | Asia     | Eastern Asia       | Hospital-based        | 1-Sep-1984  | 30-Sep-2004 |
| Huang      | 2004 | 15097441 | Taiwan                           | Kaohsiung        | Asia     | Eastern Asia       | Hospital-based        | 1-Jan-1996  | 31-Jan-2002 |
| Hung       | 2007 | 17682981 | Taiwan                           | Taipei           | Asia     | Eastern Asia       | Hospital-based        | 1-Jun-1994  | 30-Jun-2006 |
| Katiyo     | 2019 | 30381422 | United Kingdom                   | England          | Europe   | Northern Europe    | National surveillance | 1-Jan-2004  | 31-Dec-2015 |
| Kazemi     | 1974 | 4857958  | Canada                           | Montreal         | Americas | Northern America   | Hospital-based        | 1-Jun-1971  | 30-Jun-1972 |
| Keddy      | 2017 | 28353576 | South Africa                     | Gauteng Province | Africa   | Southern Africa    | Laboratory-based      | 1-Jan-2003  | 31-Dec-2013 |
| Kedzierska | 2008 | 18610655 | Poland                           | Cracow           | Europe   | Eastern Europe     | Hospital-based        | 1-Jan-2000  | 31-Dec-2006 |
| Lee        | 1994 | 7803634  | Taiwan                           | Taoyuan          | Asia     | Eastern Asia       | Hospital-based        | 1-Sep-1985  | 31-Aug-1990 |
| Lepage     | 1990 | 2228845  | Rwanda                           | Kigali           | Africa   | Eastern Africa     | Hospital-based        | 1-Mar-1982  | 31-Dec-1987 |
| Lepage     | 1987 | 2885453  | Rwanda                           | Kigali           | Africa   | Eastern Africa     | Community-based       | 16-Oct-1984 | 15-Oct-1985 |
| Lester     | 1991 | 1915383  | Denmark                          | Copenhagen       | Europe   | Northern Europe    | Laboratory-based      | 1-Jan-1984  | 31-Dec-1988 |
| Li         | 2012 | 22209686 | Taiwan                           | Tainan           | Asia     | Eastern Asia       | Hospital-based        | 1-Jan-2000  | 31-Dec-2009 |
| Lin        | 2016 | 25311404 | Taiwan                           | New Taipei City  | Asia     | Eastern Asia       | Hospital-based        | 1-Jan-2010  | 31-Dec-2012 |
| Mailtha    | 2014 | 24551225 | Burkina Faso                     | Nanoro           | Africa   | Western Africa     | Hospital-based        | 1-Jul-2012  | 31-Jul-2013 |
| Mandal     | 1988 | 3145067  | United Kingdom - England         | Manchester       | Europe   | Northern Europe    | Hospital-based        | 1-Jan-1975  | 31-Dec-1983 |
| Mandomando | 2015 | 26449950 | Mozambique                       | Manhiça          | Africa   | Eastern Africa     | Hospital-based        | 1-Jan-2001  | 31-Dec-2001 |
| Mohan      | 2019 | 30999894 | Malaysia                         | Bintulu          | Asia     | South-eastern Asia | Hospital-based        | 1-Jan-2011  | 31-Dec-2016 |
| Mtove      | 2010 | 20168998 | Tanzania                         | Muheza           | Africa   | Eastern Africa     | Hospital-based        | 1-Mar-2008  | 28-Feb-2009 |
| Muthumbi   | 2015 | 26449944 | Kenya                            | Kilifi           | Africa   | Eastern Africa     | Hospital-based        | 1-Aug-1998  | 31-Dec-2014 |
| Nesbitt    | 1989 | 2651690  | Kenya                            | Nairobi          | Africa   | Eastern Africa     | Hospital-based        | 1-Jul-1986  | 30-Nov-1986 |
| Nielsen    | 2012 | 22970162 | Ghana                            | Ashanti region   | Africa   | Western Africa     | Hospital-based        | 1-Sep-2007  | 31-Jul-2009 |
| Noriega    | 1994 | 8156265  | Belgium                          | Brussels         | Europe   | Western Europe     | Hospital-based        | 1-Jan-1975  | 31-Dec-1990 |
| Ohlsson    | 1981 | 7034458  | Saudi Arabia                     | Riyadh           | Asia     | Western Asia       | Hospital-based        | 1-Nov-1976  | 31-Oct-1980 |
| Oneko      | 2015 | 26449946 | Kenya                            | Siaya District   | Africa   | Eastern Africa     | Hospital-based        | 1-Jul-2009  | 31-Dec-2013 |

|                |      |          |                                  |                  |          |                    |                               |            |             |
|----------------|------|----------|----------------------------------|------------------|----------|--------------------|-------------------------------|------------|-------------|
| Patra          | 2018 | 30384571 | India                            | Manipal          | Asia     | Southern Asia      | Hospital-based                | 1-Jan-2012 | 31-Dec-2016 |
| Phoba          | 2014 | 23975545 | Democratic Republic of the Congo | Bwamanda         | Africa   | Middle Africa      | Hospital-based                | 1-Nov-2011 | 31-May-2012 |
| Phu            | 2020 | 32107527 | Vietnam                          | Ho Chi Minh City | Asia     | South-eastern Asia | Hospital-based                | 1-Jan-1991 | 31-Dec-2003 |
| Phu Huong Lan  | 2016 | 27513951 | Vietnam                          | Ho Chi Minh City | Asia     | South-eastern Asia | Hospital-based                | 1-Jan-2008 | 30-Jun-2013 |
| Preveden       | 2001 | 11905187 | Serbia                           | Novi Sad         | Europe   | Southern Europe    | Hospital-based                | 1-Jan-1991 | 31-Dec-1998 |
| Raucher        | 1983 | 6883890  | United States                    | New York         | Americas | Northern America   | Hospital-based                | 1-Jan-1981 | 31-Dec-1981 |
| Roberts        | 1993 | 8508819  | Canada                           | Vancouver        | Americas | Northern America   | Hospital-based                | 1-Jan-1980 | 31-Jan-1992 |
| Rongkavilit    | 2000 | 10693998 | United States                    | Miami, FL        | Americas | Northern America   | Hospital-based                | 1-Apr-1980 | 31-Mar-1997 |
| Ruiz-Contreras | 1995 | 7667058  | Spain                            | Madrid           | Europe   | Southern Europe    | Hospital-based                | 1-Jan-1984 | 31-Jan-1994 |
| Secmeer        | 1995 | 7502360  | Turkey                           | Ankara           | Asia     | Western Asia       | Hospital-based                | 1-Aug-1982 | 30-Sep-1992 |
| Seydi          | 2005 | 15695029 | Senegal                          | Dakar            | Africa   | Western Africa     | Hospital-based                | 1-Jan-1996 | 31-Dec-2003 |
| Seydi          | 2008 | 18093773 | Senegal                          | Dakar            | Africa   | Western Africa     | Hospital-based                | 1-Jan-1996 | 31-Dec-2005 |
| Shahunja       | 2015 | 26361076 | Bangladesh                       | Dhaka            | Asia     | Southern Asia      | Hospital-based                | 1-Feb-2009 | 31-Mar-2013 |
| Shahunja       | 2020 | 33264364 | Bangladesh                       | Dhaka            | Asia     | Southern Asia      | Hospital-based                | 1-Jun-2014 | 31-May-2017 |
| Shimoni        | 1999 | 10825045 | Israel                           | Petach Tikva     | Asia     | Western Asia       | Hospital-based                | 1-Jan-1987 | 31-Dec-1996 |
| Shkalim        | 2012 | 22161258 | Israel                           | Tikva            | Asia     | Western Asia       | Hospital-based                | 1-Nov-1995 | 31-Oct-2010 |
| Sigauque       | 2009 | 19131902 | Mozambique                       | Manhiça district | Africa   | Eastern Africa     | Hospital-based                | 1-May-2001 | 30-Apr-2006 |
| Sirinavin      | 1999 | 10524956 | Thailand                         | Bangkok          | Asia     | South-eastern Asia | Hospital-based                | 1-Jan-1978 | 31-Dec-1994 |
| Still          | 2020 | 32725229 | Mali                             | Bamako           | Africa   | Western Africa     | Hospital-based and outpatient | 1-Jun-2002 | 31-Dec-2018 |
| Tabu           | 2012 | 22363591 | Kenya                            | Asembo (rural)   | Africa   | Eastern Africa     | Hospital-based                | 1-Oct-2006 | 30-Sep-2009 |
| Tack           | 2020 | 32240161 | Democratic Republic of the Congo | Reput Kisantu    | Africa   | Middle Africa      | Hospital-based                | 1-Jan-2015 | 31-Oct-2017 |
| Thamlikittkul  | 1996 | 8765451  | Thailand                         | Bangkok          | Asia     | South-eastern Asia | Hospital-based                | 1-Jan-1993 | 31-Dec-1993 |
| Tsai           | 2007 | 17901796 | Taiwan                           | Taoyuan          | Asia     | Eastern Asia       | Hospital-based                | 1-May-1996 | 30-Jun-2003 |
| Vaagland       | 2004 | 15367335 | Tanzania                         | Mbulu            | Africa   | Eastern Africa     | Hospital-based                | 1-Jul-2000 | 31-Aug-2000 |
| Vandenbergh    | 2010 | 20104200 | Democratic Republic of the Congo | Kivu Province    | Africa   | Middle Africa      | Hospital-based                | 1-Jan-2002 | 31-Dec-2006 |
| Verani         | 2015 | 26449945 | Kenya                            | Lwak (rural)     | Africa   | Eastern Africa     | Population-based              | 1-Jan-2009 | 31-Dec-2014 |

|         |      |          |               |            |          |                    |                |            |             |
|---------|------|----------|---------------|------------|----------|--------------------|----------------|------------|-------------|
| Vlieghe | 2012 | 23272255 | Cambodia      | Phnom Penh | Asia     | South-eastern Asia | Hospital-based | 1-Jul-2007 | 30-Jun-2011 |
| Walsh   | 2000 | 10783021 | Malawi        | Blantyre   | Africa   | Eastern Africa     | Hospital-based | 1-Sep-1996 | 31-Aug-1997 |
| Wang    | 2006 | 16569283 | Taiwan        | Taipei     | Asia     | Eastern Asia       | Hospital-based | 1-Jan-1996 | 31-Dec-2004 |
| Yen     | 2007 | 17639163 | Taiwan        | Taipei     | Asia     | Eastern Asia       | Hospital-based | 1-Jan-2001 | 31-Dec-2003 |
| Yen     | 2009 | 19686996 | Taiwan        | Taipei     | Asia     | Eastern Asia       | Hospital-based | 1-Jan-2004 | 31-Dec-2006 |
| Yombi   | 2015 | 25819116 | Belgium       | Brussels   | Europe   | Western Europe     | Hospital-based | 1-Jan-2007 | 31-Dec-2012 |
| Zaidi   | 1999 | 10608627 | United States | Boston, MA | Americas | Northern America   | Hospital-based | 1-Jan-1979 | 31-Dec-1995 |

\*UN sub-regions with no data available include: Northern Africa, Caribbean, Central America, South America, Central Asia, Australia and New Zealand, Melanesia, Micronesia, Polynesia

**Supplementary Table S2. Prevalence of non-typhoidal *Salmonella* serovars, global, 1971 through 2019**

| <b>Serovar</b>    | <b>Cases</b> | <b>Proportion of iNTS disease, %</b> |
|-------------------|--------------|--------------------------------------|
| Typhimurium       | 5,934        | 45·7                                 |
| Enteritidis       | 4,112        | 31·7                                 |
| Dublin            | 403          | 3·1                                  |
| Virchow           | 186          | 1·4                                  |
| Isangi            | 172          | 1·3                                  |
| Choleraesuis      | 134          | 1·0                                  |
| Heidelberg        | 90           | 0·7                                  |
| Java              | 54           | 0·4                                  |
| Oranienburg       | 47           | 0·4                                  |
| Infantis          | 46           | 0·4                                  |
| Newport           | 42           | 0·3                                  |
| Stanley           | 38           | 0·3                                  |
| Panama            | 36           | 0·3                                  |
| Poona             | 36           | 0·3                                  |
| Corvallis         | 27           | 0·2                                  |
| Saintpaul         | 25           | 0·2                                  |
| Schwarzengrund    | 22           | 0·2                                  |
| Montevideo        | 21           | 0·2                                  |
| Chester           | 19           | 0·1                                  |
| Bovis-morbificans | 17           | 0·1                                  |
| Colindale         | 15           | 0·1                                  |
| Krefeld           | 15           | 0·1                                  |
| Brandenburg       | 15           | 0·1                                  |
| Hadar             | 14           | 0·1                                  |
| Agona             | 10           | 0·1                                  |
| Copenhagen        | 5            | <0·1                                 |
| Berta             | 4            | <0·1                                 |
| Derby             | 3            | <0·1                                 |
| Senftenberg       | 3            | <0·1                                 |
| Abony             | 3            | <0·1                                 |
| Livingston        | 3            | <0·1                                 |
| Bredeney          | 3            | <0·1                                 |
| Minnesota         | 3            | <0·1                                 |
| Kentucky          | 3            | <0·1                                 |
| Irumu             | 2            | <0·1                                 |
| Urbana            | 2            | <0·1                                 |
| Bareilly          | 2            | <0·1                                 |
| Kedougou          | 2            | <0·1                                 |



|                                      |               |              |
|--------------------------------------|---------------|--------------|
| Sandiego                             | 2             | <0·1         |
| Kisangani                            | 2             | <0·1         |
| Anatum                               | 2             | <0·1         |
| Braenderup                           | 2             | <0·1         |
| Albany                               | 2             | <0·1         |
| Ohio                                 | 2             | <0·1         |
| Stanleyville                         | 1             | <0·1         |
| Coeln                                | 1             | <0·1         |
| Uganda                               | 1             | <0·1         |
| Give                                 | 1             | <0·1         |
| London                               | 1             | <0·1         |
| Muenster                             | 1             | <0·1         |
| Telelkibir                           | 1             | <0·1         |
| Brancaster                           | 1             | <0·1         |
| Vitiki                               | 1             | <0·1         |
| Umbilo                               | 1             | <0·1         |
| Senegal                              | 1             | <0·1         |
| Kottbus                              | 1             | <0·1         |
| Chandans                             | 1             | <0·1         |
| Amsterdam                            | 1             | <0·1         |
| Telaviv                              | 1             | <0·1         |
| Hvittingfoss                         | 1             | <0·1         |
| Mbandaka                             | 1             | <0·1         |
| Reading                              | 1             | <0·1         |
| Freetown                             | 1             | <0·1         |
| Blockley                             | 1             | <0·1         |
| Bardo                                | 1             | <0·1         |
| Haifa                                | 1             | <0·1         |
| Bertha                               | 1             | <0·1         |
| Kibusi                               | 1             | <0·1         |
| Javiana                              | 1             | <0·1         |
| Other <i>Salmonella</i> <sup>^</sup> | 1,372         | 10·6         |
| <b>Total</b>                         | <b>12,977</b> | <b>100·0</b> |

iNTS = Non-typhoidal *Salmonella* invasive disease

<sup>^</sup> Non-typhoidal *Salmonella* serotyping performed but could not identify serovars or authors provided only top serovars and did not describe all serovars that were serotyped

**Figure S1. Case fatality ratio by year in Manhiça, Mozambique, Africa, from 2001 through 2014 (Mandomando, et al. Clin Infect Dis 2015. DOI 10.1093/cid/civ712)**

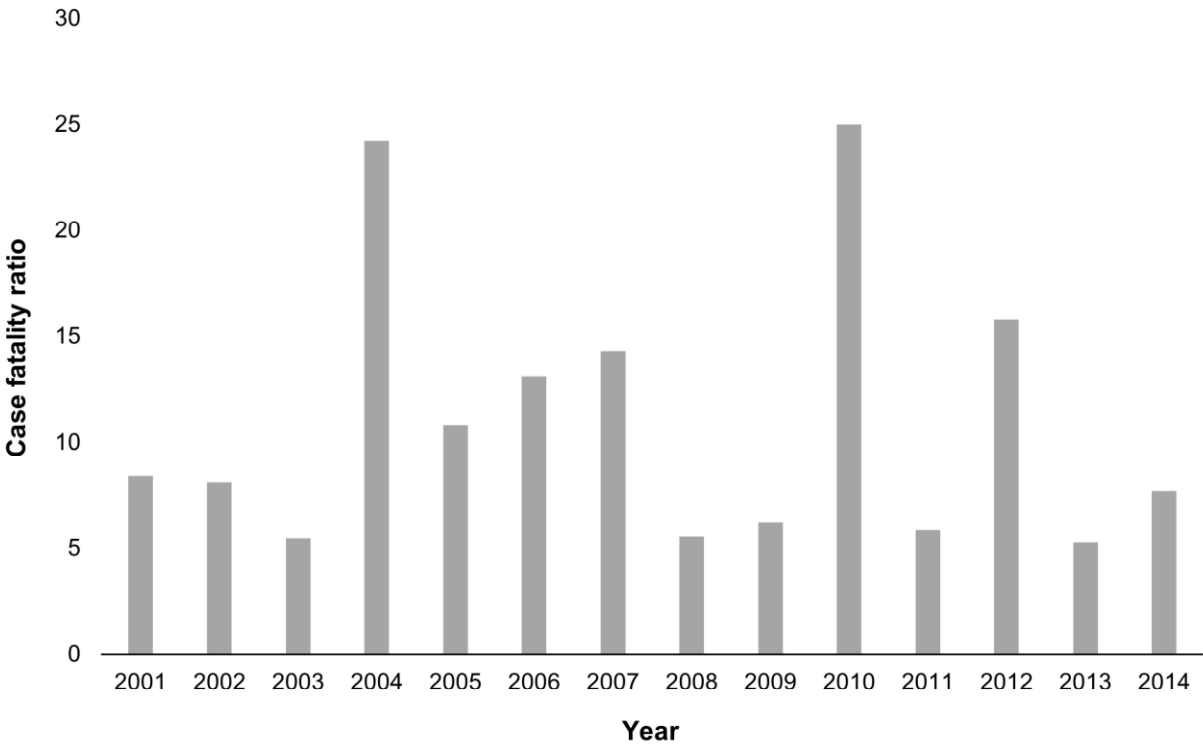

**Figure S2A. Forest plot of the association between the risk of death among iNTS participants with and without HIV-coinfection**

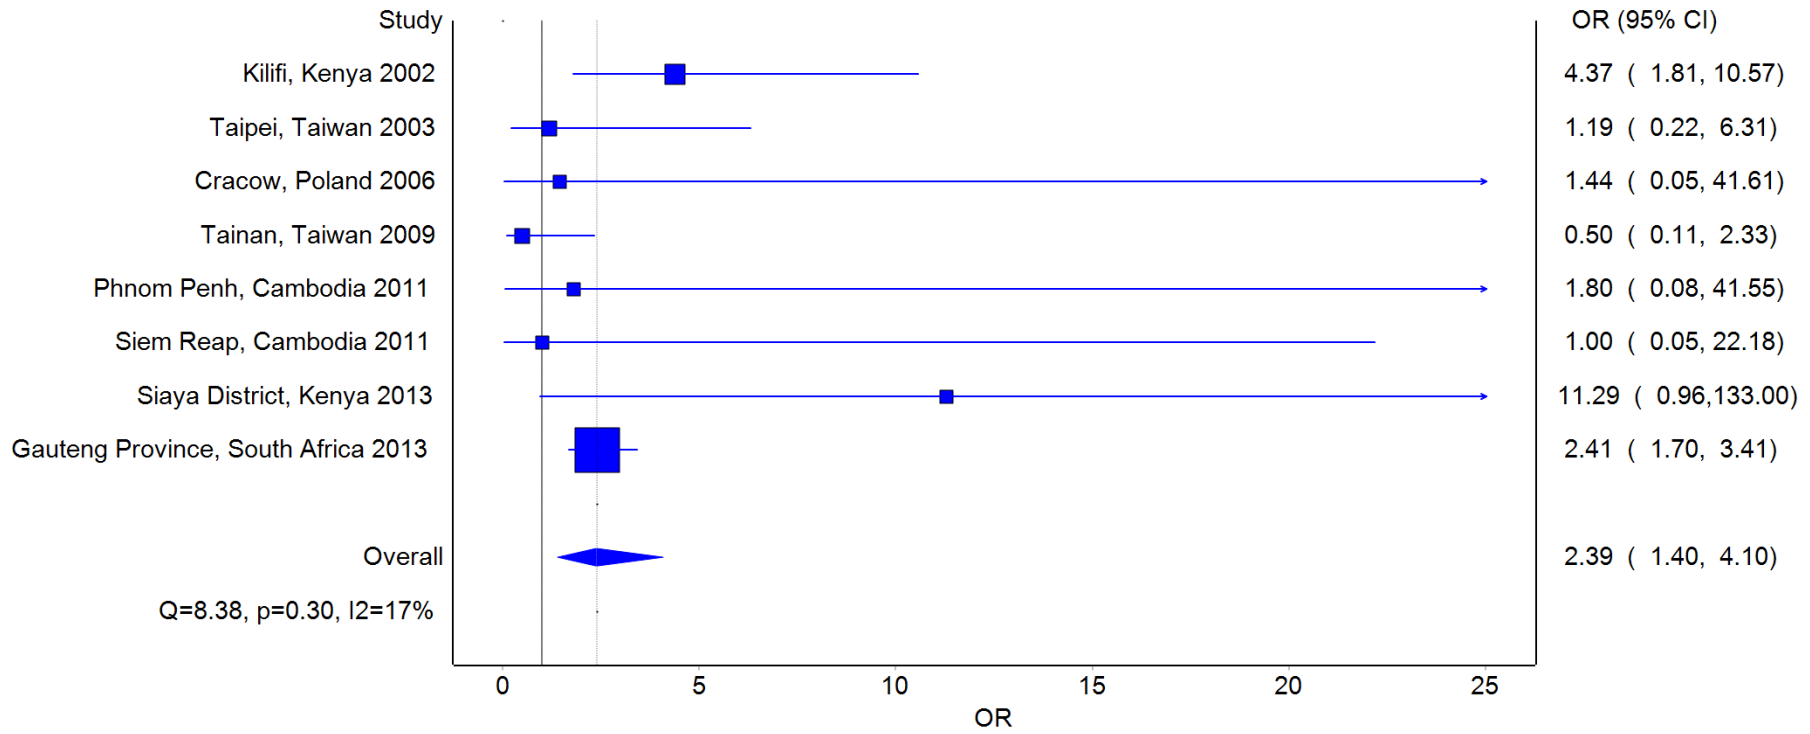

**Figure S2B. Forest plot of the association between the risk of death among iNTS participants with and without malaria-coinfection**

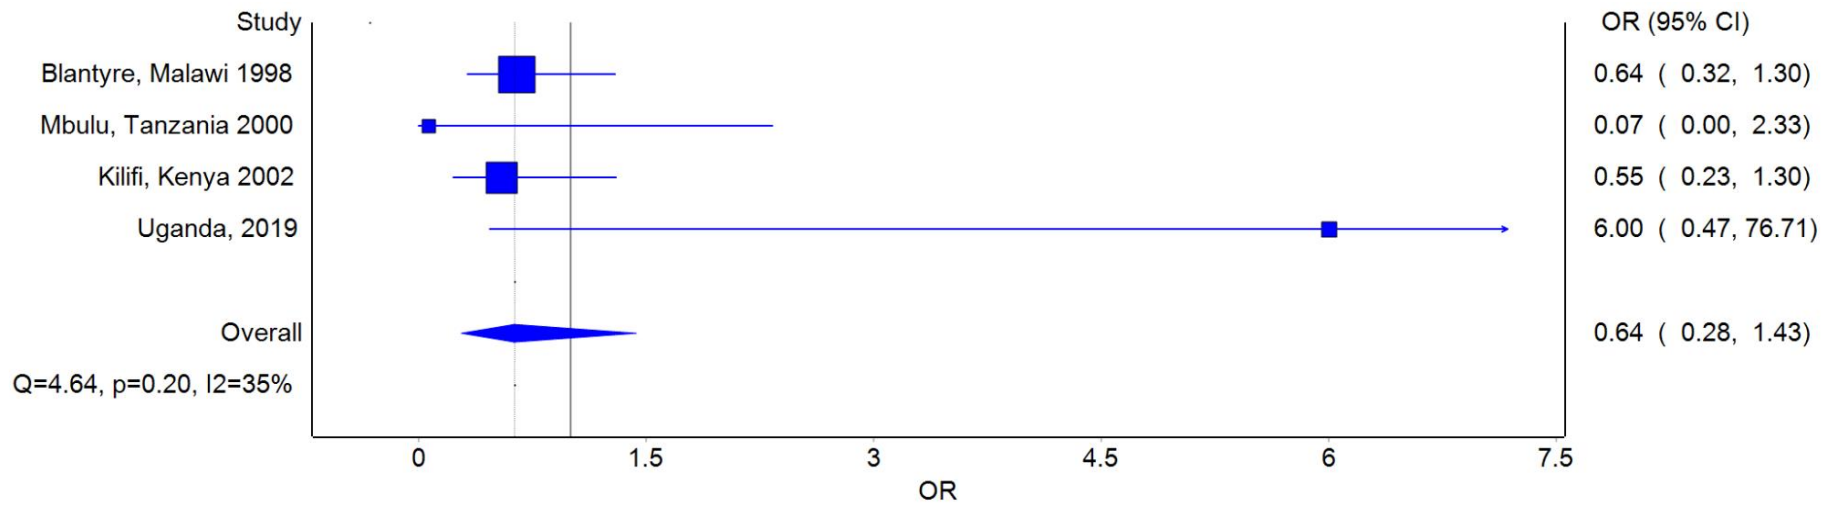

Supplement: mmc1.pdf [file mmc1.pdf]
